# Supplementary material for: Clinical outcomes of arthroscopic suture fixation combined with loop plate vs. posterior approach open reduction and cannulated screw fixation for treating tibial avulsion fractures of the posterior cruciate ligament: a retrospective study
Source: PeerJ journal article supplement (doi:10.7717/peerj.18532), 2024-11-15
Supplement: TableData.xlsx [file TableData.xlsx]

## Sheet: Arthroscopy group
			Waiting time before surgery（day）	preoperation Lysholm score									VAS preoperation	operation time（minute）	postoperation Lysholm score									VAS postoperation
				Limping	Assistive device assistance	Joint strangulation	Joint instability	Joint swelling	Upstairs	Squatting	Joint pain	Total score			Limping	Assistive device assistance	Joint strangulation	Joint instability	Joint swelling	Upstairs	Squatting	Joint pain	Total score
			4	3	2	10	5	0	2	2	5	29	5	75	5	5	15	20	10	10	5	20	90	1
			12	3	2	15	5	2	2	2	5	34	4	50	5	5	15	25	10	10	5	20	95	1
			8	3	5	10	10	2	6	4	10	50	2	80	5	5	15	25	10	10	5	20	95	1
			7	3	2	10	5	2	2	2	5	31	4	60	5	5	15	20	10	10	4	20	89	1
			2	0	2	6	5	0	2	0	0	15	6	65	5	5	15	20	10	10	4	25	94	0
			11	3	2	15	10	2	6	4	15	57	2	70	5	5	15	20	10	10	4	25	94	0
			7	5	2	15	15	10	6	4	10	67	2	100	5	5	15	25	6	10	4	25	95	0
			4	3	2	2	5	2	2	2	5	22	3	65	3	5	15	20	6	10	4	20	83	1
			5	3	5	15	5	2	2	2	5	37	3	70	5	5	15	25	6	10	5	25	96	0
			3	3	2	10	5	2	2	2	5	31	3	75	5	5	15	20	6	10	4	20	85	1
			12	5	5	15	10	2	6	2	10	55	2	60	5	5	15	25	6	10	4	25	95	0
			20	5	5	15	15	6	6	4	10	66	2	60	5	5	15	20	10	10	5	25	95	0
			5	3	2	15	5	2	2	2	10	39	2	60	5	5	15	20	6	10	5	20	91	1
			14	3	5	15	15	6	6	4	15	69	2	70	5	5	15	25	6	10	5	25	96	0
			15	3	5	6	10	2	6	4	5	41	3	65	5	5	15	20	6	10	5	20	91	1
			8	3	5	10	10	2	6	4	10	50	2	70	3	5	15	20	6	10	5	20	84	1
			5	3	2	6	10	2	2	2	5	32	3	75	5	5	15	20	10	10	4	20	89	1
			4	3	2	2	5	2	2	2	5	22	3	75	5	5	15	20	10	10	5	20	90	1
			8	3	2	15	5	2	2	2	10	39	2	60	5	5	15	20	6	10	4	20	85	1
			7	3	5	15	15	6	6	4	15	69	2	60	5	5	15	25	6	10	4	25	95	0
			4	3	2	6	10	2	2	0	5	30	4	55	5	5	15	25	6	10	5	25	96	0
			6	3	2	10	10	6	6	2	10	49	2	80	5	5	15	20	10	10	5	20	90	1
			5	3	2	6	10	2	2	2	5	32	4	85	5	5	15	20	10	10	5	25	95	0
			3	3	2	6	10	2	2	0	5	30	4	66	5	5	15	20	6	10	5	20	91	1
			4	3	2	6	5	2	2	2	5	27	3	80	3	5	15	20	10	10	5	20	88	1
			4	3	2	6	5	2	2	0	5	25	4	65	5	5	15	20	6	10	4	20	85	1
			4	3	2	10	5	0	2	2	5	29	4	80	5	5	15	20	10	10	5	20	90	1
			10	3	5	10	5	6	6	4	5	44	4	60	5	5	15	25	6	10	5	25	96	0
			11	3	2	15	5	2	2	2	10	39	2	40	5	5	15	20	10	10	5	25	95	0
			4	3	2	2	5	2	2	2	5	22	4	60	3	2	15	25	6	6	4	20	81	1
			4	3	2	15	5	2	2	2	5	34	3	60	5	5	15	20	6	10	5	20	86	1
			7	3	2	10	10	6	6	2	10	49	2	70	5	5	15	20	10	10	4	25	94	0
			18	5	5	15	10	2	6	2	10	55	2	85	5	5	15	20	6	10	4	20	85	1

## Sheet: ORIF group
			Waiting time before surgery（day）	preoperation Lysholm score									VAS preoperation	operation time（minute）	postoperation Lysholm score									VAS postoperation
				Limping	Assistive device assistance	Joint strangulation	Joint instability	Joint swelling	Upstairs	Squatting	Joint pain	Total score			Limping	Assistive device assistance	Joint strangulation	Joint instability	Joint swelling	Upstairs	Squatting	Joint pain	Total score
			5	3	0	2	5	2	2	2	5	21	4	70	5	5	15	20	6	10	4	20	85	1
			16	3	2	15	5	2	2	2	5	34	4	45	5	5	15	20	10	10	5	20	90	1
			7	3	2	10	10	2	6	4	5	42	4	60	5	5	15	20	10	10	4	25	94	0
			6	3	2	15	5	2	2	2	5	34	4	50	5	5	15	20	6	10	5	20	86	1
			20	5	2	10	10	6	6	4	10	53	2	45	3	2	15	25	6	6	4	20	81	2
			4	3	2	6	10	2	2	2	5	32	4	60	5	5	15	20	6	10	4	20	85	1
			3	3	2	10	5	0	6	2	5	33	4	85	3	2	15	25	6	6	4	20	81	2
			9	3	5	15	5	2	2	2	5	38	4	45	5	2	15	20	10	10	5	20	87	1
			3	3	2	10	5	2	2	2	5	29	5	50	5	2	15	20	6	10	4	20	82	1
			3	5	5	10	10	2	6	4	5	47	4	60	5	5	15	20	10	10	5	20	90	1
			2	3	2	10	10	0	2	2	5	34	4	60	3	2	15	20	6	10	4	20	80	1
			9	5	2	15	10	2	6	4	10	54	2	95	5	5	15	20	10	10	5	20	90	1
			6	3	2	10	10	0	2	2	10	39	2	90	5	2	15	20	6	10	4	20	82	1
